# Supplementary material
Source: publisher figshare collection journal article supplement (https://karger.figshare.com/ndownloader/files/26615654)
Supplement: Supplementary file 1 [file 26615654]

**Table S1. List of International Classification of Diseases, Ninth revision diagnostic (ICD-9) codes to identify patients with acute kidney injury (AKI) and end-stage renal disease (ESRD)**

| **Codes** | **Descriptions** |
| --- | --- |
| Acute kidney injury (AKI) | |
| 584 | Acute kidney failure |
| 584.5 | Acute kidney failure with lesion of tubular necrosis |
| 584.6 | Acute kidney failure with lesion of renal cortical necrosis |
| 584.7 | Acute kidney failure with lesion of renal medullary (papillary) necrosis |
| 584.8 | Acute kidney failure with other specified pathological lesion in kidney |
| 584.9 | Acute kidney failure, unspecified |
| End-stage renal disease (ESRD) | |
| V45.11 | Renal dialysis status |
| V45.12 | Noncompliance with renal dialysis |
| V56.0 | Encounter for extracorporeal dialysis |
| V56.1 | Fitting and adjustment of extracorporeal dialysis catheter |
| V56.2 | Fitting and adjustment of peritoneal dialysis catheter |
| V56.32 | Encounter for adequacy testing for peritoneal dialysis |
| V56.8 | Encounter for other dialysis |
| 585.6 | End-stage renal disease |
| 39.95 | Hemodialysis |
| 54.98 | Peritoneal dialysis |
| 996.68 | Infection and inflammatory reaction due to peritoneal dialysis catheter |
| Kidney transplantation | |
| V42.0 | Kidney replaced by transplant |
| 55.61 | Renal autotransplantation |
| 55.69 | Other kidney transplantation |
| 996.81 | Complications of transplanted kidney |
